# Supplementary material for: Increased Pass Rates in Introductory Biology: Benefits and Potential Costs of Implementing a Mathematics Prerequisite in a Community College Setting
Source: PubMed Central journal article supplement — CBE Life Sci Educ. 2022 Winter;21(4):ar72. doi: 10.1187/cbe.21-09-0248 (PMC9727600; doi:10.1187/cbe.21-09-0248), 2022
Supplement: cbe-21-ar72-s001.pdf [file cbe-21-ar72-s001.pdf]

# Supplemental Material

*CBE—Life Sciences Education*

Kiser *et al.*

**Table S1. Model selection, including AICc and Delta AICC values from best model for all models presented in Table 3.** Preferred model in bold.

| Outcome                    | Model                      | Varying Intercept          | AICc              | Delta AICc (from best) |          |
|----------------------------|----------------------------|----------------------------|-------------------|------------------------|----------|
| Course Grade               | <b>GPA + PreReq</b>        | <b>None</b>                | <b>2118.545</b>   | <b>0</b>               |          |
|                            | GPA                        | None                       | 2140.127          | 21.582                 |          |
|                            | Null                       | None                       | 2234.169          | 115.624                |          |
|                            | GPA + Pell * PreReq        | None                       | 2109.779          | -1.071                 |          |
|                            | <b>GPA + Pell + PreReq</b> | <b>None</b>                | <b>2110.85</b>    | <b>0</b>               |          |
|                            | GPA + PreReq               | None                       | 2115.136          | 4.286                  |          |
|                            | GPA                        | None                       | 2136.216          | 25.366                 |          |
|                            | Null                       | None                       | 2229.741          | 118.891                |          |
|                            | GPA + PEER * PreReq        | None                       | 1978.294          | 2.026                  |          |
|                            | <b>GPA + PEER + PreReq</b> | <b>None</b>                | <b>1976.268</b>   | <b>0</b>               |          |
|                            | GPA + PreReq               | None                       | 1980.633          | 4.365                  |          |
|                            | GPA                        | None                       | 2003.48           | 27.212                 |          |
|                            | Null                       | None                       | 2098.284          | 122.016                |          |
|                            | GPA + FGN * PreReq         | None                       | 2119.487          | 0.942                  |          |
|                            | GPA + FGN + PreReq         | None                       | 2117.505          | -1.04                  |          |
|                            | <b>GPA + PreReq</b>        | <b>None</b>                | <b>2118.545</b>   | <b>0</b>               |          |
|                            | GPA                        | None                       | 2140.127          | 21.582                 |          |
|                            | Null                       | None                       | 2234.169          | 115.624                |          |
|                            | GPA + Women * PreReq       | None                       | 2109.783          | 1.262                  |          |
|                            | GPA + Women + PreReq       | None                       | 2110.464          | 1.943                  |          |
|                            | <b>GPA + PreReq</b>        | <b>None</b>                | <b>2108.521</b>   | <b>0</b>               |          |
|                            | GPA                        | None                       | 2130.427          | 21.906                 |          |
|                            | Null                       | None                       | 2223.123          | 114.602                |          |
|                            | Probability of Passing     | <b>GPA + PreReq</b>        | <b>Instructor</b> | <b>740.7634</b>        | <b>0</b> |
|                            |                            | GPA                        | Instructor        | 758.1059               | 17.3425  |
|                            |                            | Null                       | Instructor        | 803.2197               | 62.4563  |
|                            |                            | <b>GPA + Pell * PreReq</b> | <b>Instructor</b> | <b>736.2029</b>        | <b>0</b> |
| GPA + Pell + PreReq        |                            | Instructor                 | 738.5405          | 2.3376                 |          |
| GPA + PreReq               |                            | Instructor                 | 739.381           | 3.1781                 |          |
| GPA                        |                            | Instructor                 | 756.2132          | 20.0103                |          |
| Null                       |                            | Instructor                 | 800.9421          | 64.7392                |          |
| GPA + PEER * PreReq        |                            | Instructor                 | 695.9693          | 1.9725                 |          |
| <b>GPA + PEER + PreReq</b> |                            | <b>Instructor</b>          | <b>693.9968</b>   | <b>0</b>               |          |
| GPA + PreReq               |                            | Instructor                 | 696.0755          | 2.0787                 |          |
| GPA                        |                            | Instructor                 | 715.2469          | 21.2501                |          |
| Null                       |                            | Instructor                 | 762.5255          | 68.5287                |          |
| GPA + FGN * PreReq         |                            | Instructor                 | 743.3681          | 2.6047                 |          |
| GPA + FGN + PreReq         |                            | Instructor                 | 741.3909          | 0.6275                 |          |

|                        |                      |                   |                 |          |
|------------------------|----------------------|-------------------|-----------------|----------|
|                        | <b>GPA + PreReq</b>  | <b>Instructor</b> | <b>740.7634</b> | <b>0</b> |
|                        | GPA                  | Instructor        | 758.1059        | 17.3425  |
|                        | Null                 | Instructor        | 803.2197        | 62.4563  |
|                        | GPA + Women * PreReq | Instructor        | 734.9882        | -1.0842  |
|                        | GPA + Women + PreReq | Instructor        | 738.051         | 1.9786   |
|                        | <b>GPA + PreReq</b>  | <b>Instructor</b> | <b>736.0724</b> | <b>0</b> |
|                        | GPA                  | Instructor        | 754.1649        | 18.0925  |
|                        | Null                 | Instructor        | 798.9924        | 62.92    |
| Course Grade           | <b>PreReq</b>        | <b>None</b>       | <b>2596.397</b> | <b>0</b> |
|                        | Null                 | None              | 3365.237        | 768.84   |
|                        | Pell * PreReq        | None              | 2583.13         | -1.105   |
|                        | <b>Pell + PreReq</b> | <b>None</b>       | <b>2584.235</b> | <b>0</b> |
|                        | PreReq               | None              | 2588.487        | 4.252    |
|                        | Pell                 | None              | 2607.789        | 23.554   |
|                        | Null                 | None              | 2611.144        | 26.909   |
|                        | PEER * PreReq        | None              | 2406.397        | 0.737    |
|                        | PEER + PreReq        | None              | 2404.876        | -0.784   |
|                        | <b>PreReq</b>        | <b>None</b>       | <b>2405.66</b>  | <b>0</b> |
|                        | PEER                 | None              | 2432.984        | 27.324   |
|                        | Null                 | None              | 2432.893        | 27.233   |
|                        | FGN * PreReq         | None              | 2600.393        | 3.996    |
|                        | FGN + PreReq         | None              | 2596.986        | 0.589    |
|                        | <b>PreReq</b>        | <b>None</b>       | <b>2596.397</b> | <b>0</b> |
|                        | FGN                  | None              | 2619.587        | 23.19    |
|                        | Null                 | None              | 2620.033        | 23.636   |
|                        | Women * PreReq       | None              | 2571.597        | 1.449    |
|                        | Women + PreReq       | None              | 2571.073        | 0.925    |
|                        | <b>PreReq</b>        | <b>None</b>       | <b>2570.148</b> | <b>0</b> |
|                        | Women                | None              | 2596.657        | 26.509   |
|                        | Null                 | None              | 2595.368        | 25.22    |
| Probability of Passing | <b>PreReq</b>        | <b>Section</b>    | <b>912.9083</b> | <b>0</b> |
|                        | Null                 | Section           | 936.0769        | 23.1686  |
|                        | <b>Pell * PreReq</b> | <b>Section</b>    | <b>905.2955</b> | <b>0</b> |
|                        | Pell + PreReq        | Section           | 908.3519        | 3.0564   |
|                        | PreReq               | Section           | 910.3579        | 5.0624   |
|                        | Pell                 | Section           | 931.3388        | 26.0433  |
|                        | Null                 | Section           | 932.5738        | 27.2783  |
|                        | PEER * PreReq        | Section           | 853.6565        | 1.507    |
|                        | PEER + PreReq        | Section           | 852.0752        | -0.0743  |
|                        | <b>PreReq</b>        | <b>Section</b>    | <b>852.1495</b> | <b>0</b> |
|                        | PEER                 | Section           | 878.4109        | 26.2614  |
|                        | Null                 | Section           | 877.8395        | 25.69    |
|                        | FGN * PreReq         | Section           | 916.2478        | 3.3395   |

|                |                |                 |          |
|----------------|----------------|-----------------|----------|
| FGN + PreReq   | Section        | 914.8637        | 1.9554   |
| <b>PreReq</b>  | <b>Section</b> | <b>912.9083</b> | <b>0</b> |
| FGN            | Section        | 937.6628        | 24.7545  |
| Null           | Section        | 936.0769        | 23.1686  |
| Women * PreReq | Section        | 900.287         | -2.111   |
| Women + PreReq | Section        | 904.091         | 1.693    |
| <b>PreReq</b>  | <b>Section</b> | <b>902.398</b>  | <b>0</b> |
| Women          | Section        | 929.5409        | 27.1429  |
| Null           | Section        | 927.6955        | 25.2975  |
